# Supplementary material for: Polyploidy and the petal transcriptome of Gossypium
Source: PubMed Central journal article supplement (PMC3890615; doi:10.1186/1471-2229-14-3), 2014-01-06

# KEGG pathway representation

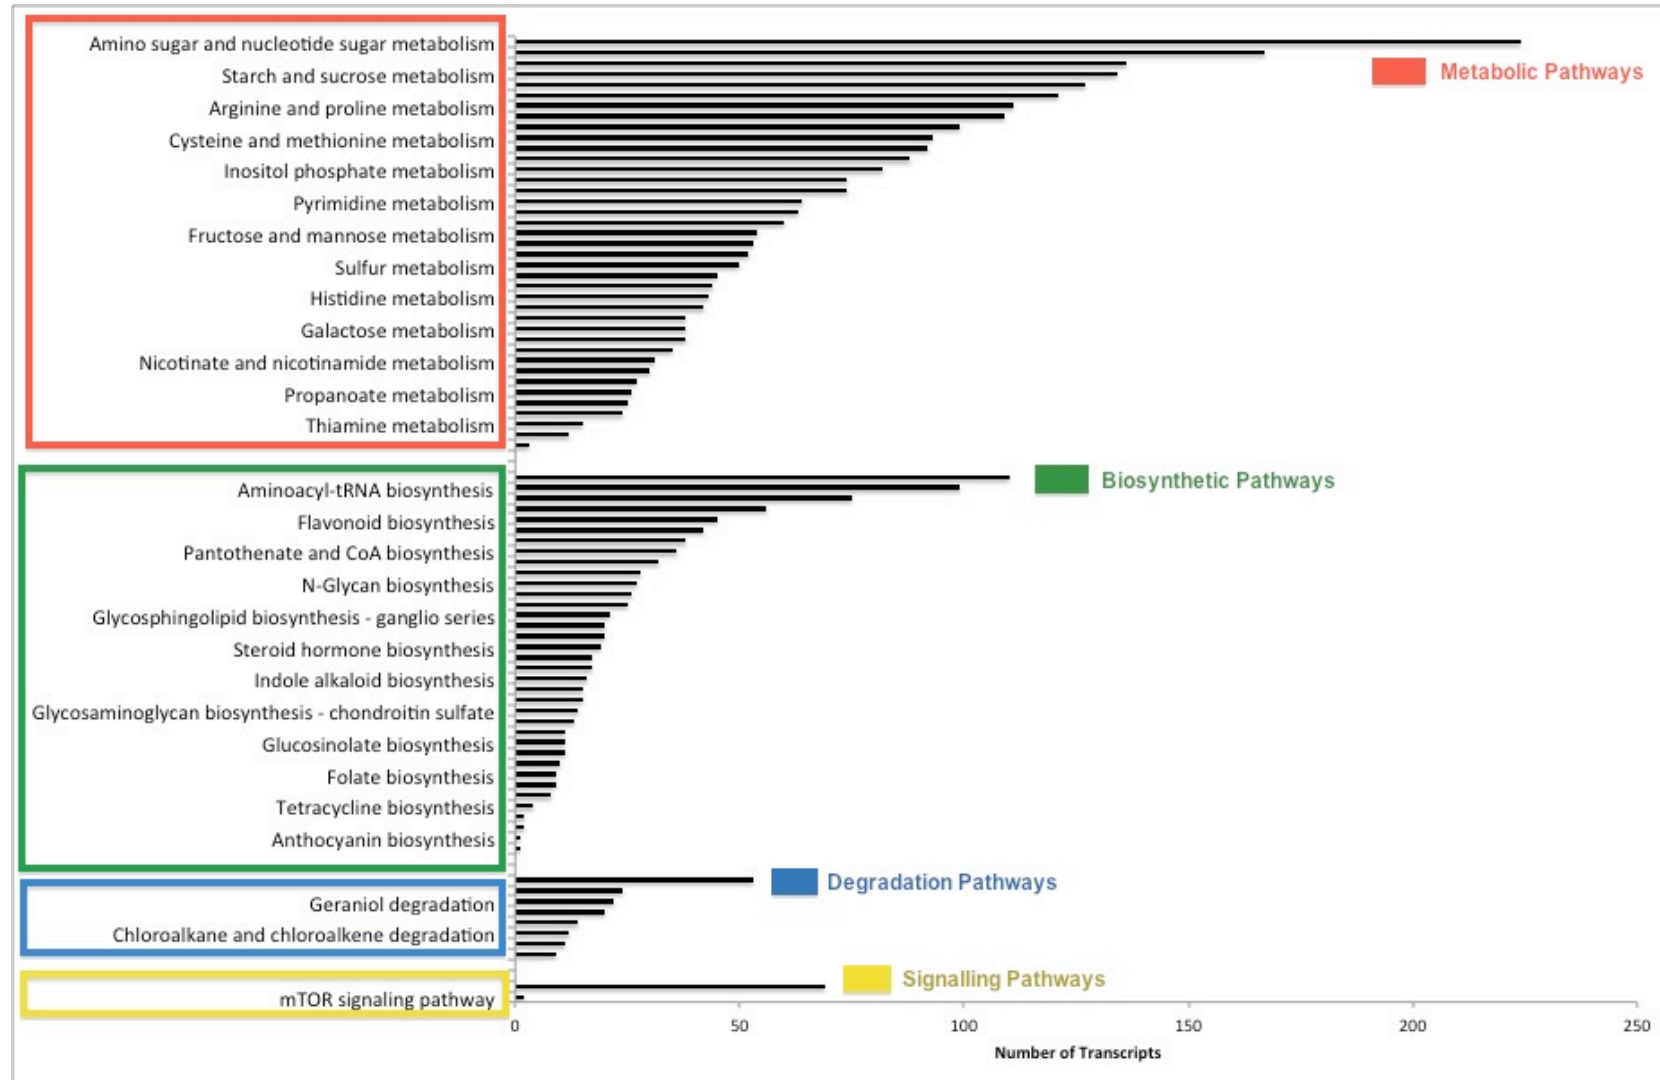

Supplement: 1471-2229-14-3-S2.pdf [file 1471-2229-14-3-S2.pdf]
