# Supplementary material for: Polyploidy and the petal transcriptome of Gossypium
Source: PubMed Central journal article supplement (PMC3890615; doi:10.1186/1471-2229-14-3), 2014-01-06
Supplement: 1471-2229-14-3-S4.pdf [file 1471-2229-14-3-S4.pdf]

|      | Diploid F1-hybrid                                                                 |            | Maxxa   |            | <i>G. tomentosum</i> |            | Ave. Natural polyploids |            | F1        |           | Mx        |           | Tom       |           |     |
|------|-----------------------------------------------------------------------------------|------------|---------|------------|----------------------|------------|-------------------------|------------|-----------|-----------|-----------|-----------|-----------|-----------|-----|
|      | RNA-seq                                                                           | Microarray | RNA-seq | Microarray | RNA-seq              | Microarray | RNA-seq                 | Microarray | At-biased | Dt-biased | At-biased | Dt-biased | At-biased | Dt-biased |     |
| I    |  | 123        | 1,581   | 295        | 1,581                | 266        | 2,064                   | 281        | 1,823     | 1         | 45        | 16        | 61        | 29        | 67  |
| II   |  | 1,615      | 4,888   | 1,269      | 3,240                | 1,235      | 2,927                   | 1,252      | 3,084     | 4         | 392       | 53        | 298       | 72        | 338 |
| III  |  | 4          | 248     | 29         | 621                  | 46         | 1,489                   | 38         | 1,055     | 0         | 0         | 1         | 8         | 7         | 9   |
| IV   |  | 1,504      | 2,264   | 1,265      | 3,496                | 1,186      | 3,578                   | 1,226      | 3,537     | 382       | 0         | 362       | 34        | 405       | 50  |
| V    |  | 1,694      | 69      | 1,478      | 553                  | 1,511      | 1,030                   | 1,495      | 792       | 4         | 80        | 54        | 232       | 67        | 289 |
| VI   |  | 1,703      | 168     | 1,578      | 523                  | 1,507      | 1,290                   | 1,543      | 907       | 90        | 1         | 201       | 56        | 274       | 64  |
| VII  |  | 11         | 452     | 27         | 1,855                | 45         | 4,387                   | 36         | 3,121     | 0         | 1         | 2         | 2         | 9         | 9   |
| VIII |  | 2,537      | 302     | 2,536      | 1,563                | 2,574      | 3,666                   | 2,555      | 2,615     | 34        | 21        | 177       | 199       | 250       | 265 |
| IX   |  | 29         | 1,951   | 100        | 4,444                | 127        | 3,857                   | 114        | 4,151     | 1         | 6         | 12        | 10        | 18        | 18  |
| X    |  | 15         | 60      | 30         | 497                  | 51         | 1,036                   | 41         | 767       | 1         | 1         | 4         | 4         | 12        | 7   |
| XI   |  | 51         | 4,629   | 71         | 4,016                | 99         | 3,403                   | 85         | 3,710     | 7         | 0         | 15        | 9         | 25        | 11  |
| XII  |  | 164        | 1,951   | 189        | 1,747                | 221        | 2,176                   | 205        | 1,962     | 5         | 0         | 42        | 3         | 65        | 12  |
